# Supplementary material
Source: PubMed Central journal article supplement (PMC4491297)
Supplement: CJN.10981114_CJN10981114SupplementaryData.pdf [file CJN.10981114_CJN10981114SupplementaryData.pdf]

**Supplementary Figure 1: Geographical distribution of United Kingdom cystinuria cohort.**

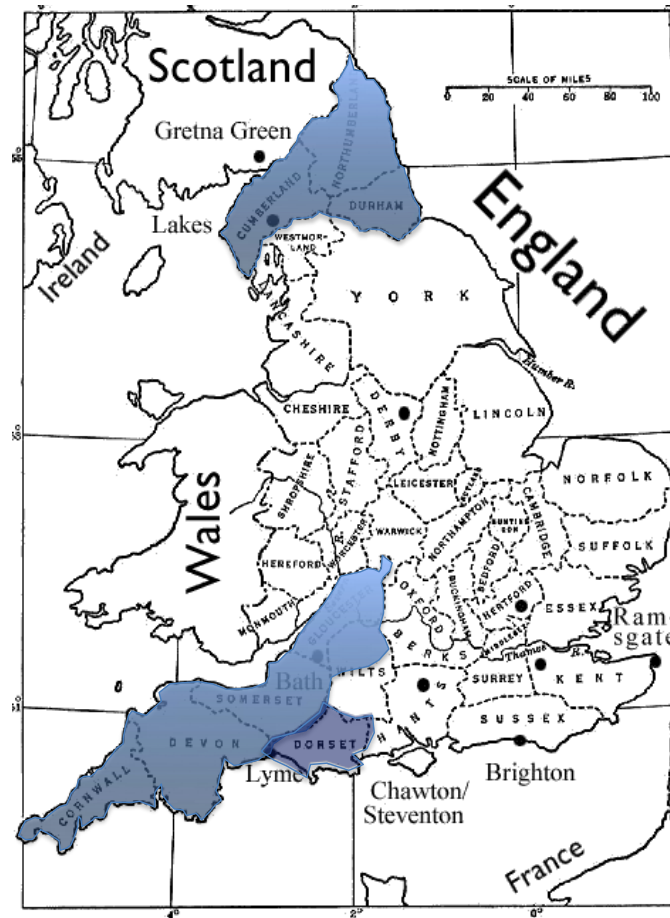

Patients were recruited from the South West of England (including Southmead Hospital at North Bristol NHS Trust, Bristol Royal Hospital for Children, Dorset County Hospital, Royal Devon and Exeter Hospital and the Royal Cornwall Hospital) and the North East of England (including Newcastle Hospitals NHS Foundation Trust).

**Supplementary Table 1: Seven patients suffered severe side effects of penicillamine**

| <b>Side effects of penicillamine</b>                 | <b>Frequency</b> |
|------------------------------------------------------|------------------|
| Elastosis serpiginosa perforans                      | 1                |
| Dermopathy                                           | 2                |
| Drug induced membranous nephropathy                  | 1                |
| Drug induced lupus                                   | 2                |
| Albuminuria                                          | 1                |
| Other (rash, nausea, migraine, leg pain, flank pain) | 7                |

**Supplementary Table 2: Genetic analysis and clinical characteristics, arranged by genotype**

| ID                   | Type |         | DNA variant and predicted protein description                       | Gender | Age at 1st stone event (y) | Age at diagnosis (y) | Delay in diagnosis (y) | Spont stones | Litho | Ops | Total stone events | Stone events per year | Stag-horn stone | 24 hr cystine (latest) $\mu\text{mol/L}^{\#}$ | eGFR | Current age | Rx        |
|----------------------|------|---------|---------------------------------------------------------------------|--------|----------------------------|----------------------|------------------------|--------------|-------|-----|--------------------|-----------------------|-----------------|-----------------------------------------------|------|-------------|-----------|
| <b><i>SLC3A1</i></b> |      |         |                                                                     |        |                            |                      |                        |              |       |     |                    |                       |                 |                                               |      |             |           |
| 1                    | AA   | Com het | c.[161delC] (;) [exon 5-9 dup]<br>p.[Gln55fs*51] (;) [exon 5-9 dup] | F      | 17                         | 20                   | 3                      | 0            | 0     | 5   | 5                  | 0.36                  |                 | 2130                                          | 71.4 | 31          | pc, P     |
| 2                    | AA   | Com het | c.[356dupA] (;) [1400T>C]<br>p.[Glu120Glyfs*16] (;) [Met467Thr]     | M      | 7                          | 9                    | 2                      | 1            | 1     | 3   | 5                  | 0.09                  |                 | (239)                                         | 87   | 64          | P         |
| 3                    | AA   | Com het | c.[del exon 2-4] (;) [del exon 10]                                  | M      | 21                         | 21                   | 0                      | 0            | 2     | 3   | 5                  | 0.28                  |                 | _                                             | 96   | 39          | P         |
| 4                    | AA   | Com het | c.[647C>T] ; [Del 2-3]<br>p.[Thr216Met] ; [Del 2-3]                 | F      | 19                         | 20                   | 1                      | 7            | 1     | 1   | 9                  | 0.31                  |                 | (2069)                                        | 79.8 | 45          | sb, T     |
| 5                    | AA   | Com het | c.[647C>T] (;) [1578G>A]<br>p.[Thr216Met] (;) [Trp526*]             | M      | 25                         | 42                   | 17                     | 20           | 7     | 5   | 32                 | 1.10                  |                 | 4344                                          | 45   | 54          | pc, sb    |
| 6                    | AA   | Com het | c.[761A>C] (;) [c.1799G>A]<br>p.[Asn254Thr] (;) [Gly600Glu]         | F      | 21                         | 21                   | 0                      | 15           | 0     | 4   | 19                 | 3.17                  |                 | 1704 (3178)                                   | 86   | 27          |           |
| 7                    | AA   | Hom     | c.[1093C>T] ; [1093C>T]<br>p.[Arg365Trp] ; [Arg365Trp]              | F      | 15                         | 15                   | 0                      | 0            | 0     | 3   | 3                  | 0.21                  |                 | 1295 (1209)                                   | 79   | 29          | sb, T, lp |
| 8                    | AA   | Hom     | c.[1136+2T>C] ; [1136+2T>C]                                         | F      | 24                         | 24                   | 0                      | 20           | 0     | 94  | 114                | 7.13                  |                 | 4065 (1307)                                   | 102  | 40          | pc, T     |
| 9                    | AA   | Com hom | c.[1332+2T>A] (;) [1372G>A]<br>p.[?] (;) [Gly458Arg]                | M      | 34                         | 36                   | 2                      | ?0           | 0     | 4   | 4                  | 1.33                  |                 | 3621 (3621)                                   | 68   | 37          |           |
| 10                   | AA   | Com het | c.[1354C>T] ; [exon 5-10 del]<br>p.[Arg452Trp] ; [exon 5-10 del]    | M      | 17                         | 17                   | 0                      | 7            | 5     | 3   | 15                 | 5                     |                 | 3262 (3754)                                   | 73   | 20          | pc        |
| 11                   | AA   | Com het | c.[1354C>T] (;) [exon 5-9 dup]<br>p.[Arg452Trp] (;) [exon 5-9 dup]  | M      | 34                         | 34                   | 0                      | 0            | 0     | 3   | 3                  | 0.07                  |                 | 4018 (966)                                    | 68   | 79          | T, lp     |
| 12                   | AA   | Com het | c.[1354C>T] (;) [1400T>C]<br>p.[Arg452Trp] (;) [Met467Thr]          | F      | 33                         | 34                   | 1                      | 0            | 3     | 3   | 3                  | 0.25                  |                 | 1500 (1534)                                   | 71.7 | 43          | pc, T     |
| 13                   | AA   | Com het | c.[1400T>C] (;) [exon 2 del]<br>p.[Met467Thr] (;) [exon 2 del]      | F      | 23                         | 24                   | 1                      | 1            |       | 2   | 2                  | 0.5                   |                 | 1542                                          | >90  | 29          |           |

| ID            | Type |         | DNA variant and predicted protein description                            | Gender | Age at 1st stone event (y) | Age at diagnosis (y) | Delay in diagnosis (y) | Spont stones | Litho | Ops | Total stone events | Stone events per year | Stag-horn stone | 24 hr cystine (latest) $\mu\text{mol/L}^{\#}$ | eGFR  | Current age | Rx        |
|---------------|------|---------|--------------------------------------------------------------------------|--------|----------------------------|----------------------|------------------------|--------------|-------|-----|--------------------|-----------------------|-----------------|-----------------------------------------------|-------|-------------|-----------|
| 14            | AA   | Com het | c.[1400T>C] (;) [exon 5-9 dup]<br>p.[Met467Thr] (;) [exon 5-9 dup]       | M      | 2                          | 2                    | 0                      | 0            | 3     | 5   | 8                  | 0.32                  | YES             | 540                                           | 88.5  | 27          | pc, T     |
| 15            | AA   | Com het | c.[1400T>C] (;) [exon 5-9 dup]<br>p.[Met467Thr] (;) [exon 5-9 dup]       | F      | 11                         | 18                   | 7                      | 90           | 2     | 14  | 106                | 2.72                  |                 | 2379 (1561)                                   | 87    | 50          | P         |
| 16            | AA   | Com het | c.[1400T>C] (;) [exon 5-9 dup]<br>p.[Met467Thr] (;) [exon 5-9 dup]       | F      | 48                         | 49                   | 1                      | 0            | 2     | 4   | 6                  | 0.67                  | YES             | 2200 (1915)                                   | >90   | 57          | pc        |
| 17            | AA   | Com het | c.[1400T>C] (;) [exon 5-9 dup]<br>p.[Met467Thr] (;) [exon 5-9 dup]       | F      | 29                         | 29                   | 0                      | 10           | 0     | 6   | 16                 | 0.53                  |                 | 3600                                          | 65.3  | 59          | pc        |
| 18            | AA   | Com het | c.[1400T>C] (;) [exon 5-9 dup]<br>p.[Met467Thr] (;) [exon 5-9 dup]       | F      | 16                         | 54                   | 38                     | ?            | 0     | 1   | 1                  | NK                    |                 | 992                                           | 16    | 70          | lp        |
| 19            | AA   | Hom     | c.[1400T>C] ; [1400T>C]<br>p.[Met467Thr] ; [Met467Thr]                   | F      | 16                         | 57                   | 41                     | 1            | 0     | 5   | 6                  | 0.13                  | YES             | 3330 (1437)                                   | 62.2  | 62          | pc, T, lp |
| 20            | AA   | Hom     | c.[1400T>C] ; [1400T>C]<br>p.[Met467Thr] ; [Met467Thr]                   | M      | 55                         | 56                   | 1                      | 4            | 0     | 0   | 4                  | 0.44                  |                 | 1862                                          | >90   | 64          |           |
| 21            | AA   | Com het | c.[1400T>C] (;) [1796T>C]<br>p.[Met467Thr] (;) [Phe599Ser]               | F      | 46                         | 46                   | 0                      | 0            | 0     | 5   | 5                  | 0.5                   |                 | 3534 (2673)                                   | 96    | 56          |           |
| 22            | AA   | Hom     | c.[1412C>G] ; [1412C>G]<br>p.[Thr471Arg] ; [Thr471Arg]                   | M      | 25                         | 27                   | 2                      | ?            | 2     | 6   | >8                 | NK                    |                 | 2778 (1511)                                   | 97    | 43          | sb, P     |
| 23            | AA   | Com het | c.[1975C>T] (;) [exon 5-9 dup]<br>p.[Gln659*] (;) [exon 5-9 dup]         | F      | 3                          | 2                    | 0                      | ?            | 0     | 1   | >1                 | NK                    |                 | (2549)                                        | 111.4 | 35          | pc, P     |
| 24 F1         | AA   | Hom     | c.[2020dupT] ; [2020dupT]<br>p.[Tyr674Leufs*20] ; [Tyr674Leufs*20]       | F      | 48                         | 49                   | 1                      | 0            | 0     | 1   | 1                  | 0.33                  |                 | 2469                                          | 89.7  | 51          | P         |
| 25 F1         | AA   | Hom     | c.[2020dupT] ; [2020dupT]<br>p.[Tyr674Leufs*20] ; [Tyr674Leufs*20]       | F      | 20                         | 23                   | 3                      | 0            | 0     | 3   | 3                  | 0.08                  |                 | _                                             | 85    | 58          | sb, P     |
| 26            | AA   | Com het | c.[2020dupT] (;) [exon 5-9 dup]<br>p.[Tyr674Leufs*20] (;) [exon 5-9 dup] | F      | 7                          | 15                   | 8                      | 50           | 2     | 16  | 68                 | 3.4                   |                 | 4070 (957)                                    | 61.2  | 27          | sb, P     |
| 27            | AA   | Com het | c.[2020dupT] (;) [exon 5-9 dup]<br>p.[Tyr674Leufs*20] (;) [exon 5-9 dup] | F      | 48                         | 51                   | 3                      | 0            | 0     | 2   | 2                  | 0.13                  |                 | _                                             | 34    | 64          | P, lp     |
| <b>SLC7A9</b> |      |         |                                                                          |        |                            |                      |                        |              |       |     |                    |                       |                 |                                               |       |             |           |

| ID    | Type |         | DNA variant and predicted protein description                              | Gender | Age at 1st stone event (y) | Age at diagnosis (y) | Delay in diagnosis (y) | Spont stones | Litho | Ops | Total stone events | Stone events per year | Stag-horn stone | 24 hr cystine (latest) $\mu\text{mol/L}^\#$ | eGFR | Current age | Rx        |
|-------|------|---------|----------------------------------------------------------------------------|--------|----------------------------|----------------------|------------------------|--------------|-------|-----|--------------------|-----------------------|-----------------|---------------------------------------------|------|-------------|-----------|
| 28 F2 | BB   | Hom     | c.[313G>A] ; [313G>A]<br>p.[Gly105Arg] ; [Gly105Arg]                       | M      | 29                         | 29                   | 0                      | 2            | 0     | 0   | 2                  | 0.12                  |                 | (644)                                       | 77   | 46          | T         |
| 29    | BB   | Com het | c.[313G>A] (;) [614dupA]<br>p.[Gly105Arg] (;) [Asn206Glufs*3]              | F      | 28                         | 30                   | 2                      | 5            | 2     | 6   | 13                 | 0.42                  |                 | 3284 (n/a Tx)                               | Tx   | 59          | Tx        |
| 30    | BB   | Com het | c.[368C>T] (;) 671C>T]<br>p.[Thr123Met] (;) [Ala224Val]                    | M      | 42                         | 42                   | 0                      | 0            | 9     | 5   | 14                 | 0.88                  | YES             | 6504                                        | >90  | 58          | c         |
| 31    | BB   | Com het | c.[411_412delTG] (;) [614dupA]<br>p.[Pro139Leufs*69] (;) [Asn206Glufs*3]   | M      | 10                         | 10                   | 0                      | 1            | 0     | 12  | 13                 | 0.68                  |                 | 5305 (3095)                                 | 74   | 29          | P         |
| 32    | BB   | Com het | c.[414_415delGC] (;) [exon 12 del]<br>p.[Pro139Leufs*69] (;) [exon 12 del] | M      | 17                         | 18                   | 1                      | 1-2 per y    | 3     | 11  | 34                 | 2.62                  | YES             | 3147                                        | 80.9 | 30          | pc, T     |
| 33    | BB   | Com het | c.[411_412del] (;) [exon 12 del]<br>p.[Pro139Leufs*69] (;) [exon 12 del]   | M      | 34                         | 34                   | 0                      | 0            | 0     | 2   | 2                  | 0.4                   |                 | 3277                                        | >90  | 39          | pc, T, lp |
| 34    | BB   | Hom     | c.[544G>A] ; [544G>A]<br>p.[Ala182Thr] ; [Ala182Thr]                       | M      | 45                         | 45                   | 0                      | 10           | 4     | 0   | 10                 | 0.45                  |                 | _                                           | 80   | 76          | pc        |
| 35    | BB   | Com het | c.[544G>A] (;) [614dupA]<br>p.[Ala182Thr] (;) [Asn206Glufs*3]              | M      | 7                          | 48                   | 41                     | 6            | 0     | 2   | 8                  | 0.18                  |                 | _                                           | >90  | 52          |           |
| 36    | BB   | Hom     | c.[614dupA] ; [614dupA]<br>p.[Asn206Glufs*3] ; [Asn206Glufs*3]             | F      | 14                         | 25                   | 11                     | 3            | 2     | 5   | 10                 | 0.26                  |                 | 1662 (2062)                                 | 83** | 52          | P         |
| 37    | BB   | Hom     | c.[614dupA] ; [614dupA]<br>p.[Asn206Glufs*3] ; [Asn206Glufs*3]             | F      | 16                         | 29                   | 13                     | 20           | 0     | 2   | 22                 | 0.44                  | YES             | 4381 (1677)                                 | 49.8 | 66          | sb, P     |
| 38    | BB   | Hom     | c.[614dupA] ; [614dupA]<br>p.[Asn206Glufs*3] ; [Asn206Glufs*3]             | M      | 41                         | 41                   | 0                      | 2            | 0     | 2   | 4                  | 0.09                  | YES             | (3469)                                      | 18   | 86          |           |
| 39    | BB   | Com het | c.[614dupA] (;) [1400-2A>G]<br>p.[Asn206Glufs*3] (;) [splicing]            | F      | 22                         | 23                   | 1                      | 100          | 14    | 22  | 136                | 3.09                  |                 | _                                           | 66   | 66          | T, lp     |
| 40 F3 | BB   | Com het | c.[614dupA] (;) [exon 12 del]<br>p.[Asn206Glufs*3] (;) [exon 12 del]       | M      | 36                         | 12                   | 0                      | 3            | 0     | 0   | 3                  | 1                     |                 | 4602 (1978)                                 | 83   | 39          | P, lp     |
| 41 F3 | BB   | Com het | c.[614dupA] (;) [exon 12 del]<br>p.[Asn206Glufs*3] (;) [exon 12 del]       | F      | 10                         | 10                   | 0                      | 30           | 6     | 16  | 52                 | 1.58                  | YES             | _ (929)                                     | 27   | 43          | sb, c, lp |

| ID       | Type |                  | DNA variant and predicted protein description                                                                        | Gender | Age at 1st stone event (y) | Age at diagnosis (y) | Delay in diagnosis (y) | Spont stones | Litho | Ops | Total stone events | Stone events per year | Stag-horn stone | 24 hr cystine (latest) $\mu\text{mol/L}^\#$ | eGFR      | Current age | Rx       |
|----------|------|------------------|----------------------------------------------------------------------------------------------------------------------|--------|----------------------------|----------------------|------------------------|--------------|-------|-----|--------------------|-----------------------|-----------------|---------------------------------------------|-----------|-------------|----------|
| 42       | BB   | Hom              | c.[671C>T] ; [671C>T]<br>p.[Ala224Val] ; [Ala224Val]                                                                 | M      | 24                         | 24                   | 0                      | 0            | 2     | 5   | 7                  | 0.24                  |                 | –<br>(n/a Tx)                               | Tx        | 53          |          |
| 43       | BB   | Com het          | c.[671C>T] (;) [997C>T]<br>p.[Ala224Val] (;) [Arg333Trp]                                                             | F      | 4                          | 2                    | 0                      | 70           | NK    | 15  | 85                 | 4.47                  | YES             | 1630<br>(1500)                              | 50        | 23          | sb,<br>T |
| 44       | BB   | Com het          | c.[671C>T] (;) [1369T>C]<br>p.[Ala224Val] (;) [Tyr457His]                                                            | M      | 55                         | 63                   | 8                      | 1            | 3     | 0   | 4                  | 0.5                   |                 | –                                           | >90       | 63          |          |
| 45       | BB   | Com het          | c.[962G>A] (;) [1399+4_1399+7del]<br>p.[Cys321Tyr] (;) [splicing]                                                    | F      | 19                         | 19                   | 0                      | >100         | 0     | >6  | ~106               | ~13.25                |                 | 2576<br>(1111)                              | 90        | 27          | P,<br>lp |
| 46       | BB   | Com het          | c.[1399+4_1399+7del] (;) [exon 12del]                                                                                | M      | 17                         | 17                   | 0                      | 1-2/y        | 2     | 8   | 44                 | 2                     | YES             | 4838<br>(2845)                              | >90       | 39          | pc,<br>T |
| 47       | BB   | Com het          | c.[1353C>A] (;) [1400-2A>G]<br>p.[Tyr451*] (;) [splicing]                                                            | F      | 26                         | 27                   | 1                      | 0            | 0     | 3   | 3                  | 0.38                  |                 | 1317                                        | 35.9      | 34          | pc,<br>T |
|          |      |                  | <b><i>SLC3A1 and SLC7A9</i></b>                                                                                      |        |                            |                      |                        |              |       |     |                    |                       |                 |                                             |           |             |          |
| 48       | AAB  | Com het          | SLC3A1: c.[exon 2-3 del] ; [exon 5-9 dup],<br>SLC7A9: c.[544G>A] (;) [=]<br>p.[Ala182Thr] (;) [=]                    | M      | 15                         | 15                   | 0                      | 5            | 0     | 0   | 5                  | 2.5                   |                 | 123*<br>(598)                               | 62        | 17          | pc       |
| 49<br>F2 | BBA  | Hom +<br>Com het | SLC7A9: c.[313G>A] ; [313G>A]<br>p.[Gly105Arg] ; [Gly105Arg]<br>SLC3A1: c.[1400T>C] (;) [=]<br>p.[Met467Thr] (;) [=] | F      | 32                         | 32                   | 0                      | 0            | 3     | 1   | 4                  | 0.36                  |                 | 1258<br>(1258)                              | 77.9      | 43          |          |
| 50       | BBB  | Hom +Com het     | SLC7A9: c.[544G>A;1060G>A] (;)<br>[544G>A]<br>p.[Ala182Thr;Ala354Thr] ; [Ala182Thr]                                  | F      | 47                         | 47                   | 0                      | 3            | 1     | 7   | 11                 | 0.73                  | YES             | 1217                                        | 83.4      | 62          | pc       |
|          |      |                  | <b><i>SLC3A1</i></b>                                                                                                 |        |                            |                      |                        |              |       |     |                    |                       |                 |                                             |           |             |          |
| 51       | A    | het              | c.[761A>C] (;) [=]<br>p.[Asn254Thr] (;) [=]                                                                          | F      | 11                         | 11                   | 0                      | 0            | 0     | 6   | 6                  | 0.16                  |                 | 2144                                        | 60.9      | 48          | pc       |
| 52       | A    | het              | c.[exon 5-9dup] (;) [=]                                                                                              | F      | 25                         | 53                   | 28                     | 2            | 0     | 1   | 3                  | 0.1                   |                 | 2436<br>(2436)                              | 70        | 55          | lp       |
| 53       | A    | het              | c.[exon 5-9dup] (;) [=]                                                                                              | M      | 19                         | 25                   | 6                      | 2            | 0     | 2   | 4                  | 0.07                  |                 | –                                           | 14**<br>* | 79          |          |

| ID            | Type |     | DNA variant and predicted protein description        | Gender | Age at 1st stone event (y) | Age at diagnosis (y) | Delay in diagnosis (y) | Spont stones      | Litho | Ops | Total stone events | Stone events per year | Stag-horn stone | 24 hr cystine (latest) $\mu\text{mol/L}^\#$ | eGFR | Current age | Rx       |
|---------------|------|-----|------------------------------------------------------|--------|----------------------------|----------------------|------------------------|-------------------|-------|-----|--------------------|-----------------------|-----------------|---------------------------------------------|------|-------------|----------|
| 54<br>F4      | A    | het | c.[exon 5-9dup] (;) [=]                              | M      | 9                          | 27                   | 18                     | 1-2 per week      | 2     | 6   | ~3440              | ~78.2                 |                 | 2110                                        | 71.2 | 53          | pc, c, T |
| 55<br>F4      | A    | het | c.[exon 5-9dup] (;) [=]                              | F      | 13                         | 13                   | 0                      | 0                 | 2     | 3   | 6                  | 0.11                  | YES             | 4072                                        | 65.1 | 57          | pc, c    |
| <b>SLC7A9</b> |      |     |                                                      |        |                            |                      |                        |                   |       |     |                    |                       |                 |                                             |      |             |          |
| 56            | B    | het | c.[313G>A] (;) [=]<br>p.[Gly105Arg] (;) [=]          | M      | 17                         | 23                   | 6                      | 1                 | 0     | 1   | 2                  | 0.33                  |                 | 112                                         | >90  | 23          |          |
| 57            | B    | het | c.[313G>A] (;) [=]<br>p.[Gly105Arg] (;) [=]          | F      | 24                         | 28                   | 4                      | 0                 | 2     | 2   | 4                  | 0.8                   |                 | 2770                                        | >90  | 29          | lp, pc   |
| 58            | B    | het | c.[313G>A] (;) [=]<br>p.[Gly105Arg] (;) [=]          | F      | 17                         | 18                   | 1                      | 5                 | 0     | 0   | 5                  | 0.25                  |                 | 1050                                        | 45.4 | 37          | sb, c    |
| 59            | B    | het | c.[411_412del] (;) [=]<br>p.[Pro139Leufs*69] (;) [=] | M      | 34                         | 45                   | 11                     | 3                 | 0     | 0   | 3                  | 3                     |                 | 163*                                        | 63.7 | 45          | lp       |
| 60            | B    | het | c.[544G>A] (;) [=]<br>p.[Ala182Thr] (;) [=]          | M      | 49                         | 60                   | 11                     | 2                 | 1     | 0   | 2                  | 0.27                  |                 | _                                           | >90  | 60          | -        |
| 61            | B    | het | c.[544G>A] (;) [=]<br>p.[Ala182Thr] (;) [=]          | M      | 62                         | 71                   | 9                      | 0                 | 2     | 0   | 2                  | 0.22                  |                 | _                                           | >90  | 71          | -        |
| 62            | B    | het | c.[614dupA] (;) [=]<br>p.[Asn206Glufs*3] (;) [=]     | M      | 43                         | 45                   | 2                      | 3                 | 0     | 0   | 3                  | 1                     |                 | 1665                                        | >90  | 46          | -        |
| 63            | B    | het | c.[614dupA] (;) [=]<br>p.[Asn206Glufs*3] (;) [=]     | M      | 23                         | 24                   | 1                      | too many to count | 2     | 17  | many               | NK                    |                 | (3340)                                      | 61.8 | 44          | pc, c, T |
| 64            | B    | het | c.[614dupA] (;) [=]<br>p.[Asn206Glufs*3] (;) [=]     | M      | 39                         | 46                   | 7                      | 5                 | 5     | 3   | 10                 | 1.63                  |                 | _                                           | >90  | 47          |          |
| 65            | B    | het | c.[671C>T] (;) [=]<br>p.[Ala224Val] (;) [=]          | M      | 25                         | 25                   | 0                      | 1-2 per year      | 2     | 8   | >12                | ~2.75                 |                 | 1980                                        | >90  | 33          | pc       |
| 66            | B    | het | c.[671C>T] (;) [=]<br>p.[Ala224Val] (;) [=]          | M      | 40                         | 40                   | 0                      | 0                 | 1     | 1   | 2                  | 0.09                  | YES             | 5706                                        | 39.2 | 62          | sb       |
| 67            | B    | het | c.[671C>T] (;) [=]<br>p.[Ala224Val] (;) [=]          | M      | 26                         | 65                   | 39                     | 1 per year        | 0     | 0   | 40                 | ~1                    |                 | 1676                                        | 69.6 | 66          |          |
| 68            | B    | het | c.[671C>T] (;) [=]<br>p.[Ala224Val] (;) [=]          | M      | 17                         | 18                   | 1                      | 0                 | 0     | 2   | 2                  | 0.07                  |                 | 1290                                        | 77.5 | 44          | pc       |

| ID | Type |     | DNA variant and predicted protein description | Gender | Age at 1st stone event (y) | Age at diagnosis (y) | Delay in diagnosis (y) | Spont stones      | Litho | Ops | Total stone events | Stone events per year | Stag-horn stone | 24 hr cystine (latest) $\mu\text{mol/L}^{\#}$ | eGFR | Current age | Rx    |
|----|------|-----|-----------------------------------------------|--------|----------------------------|----------------------|------------------------|-------------------|-------|-----|--------------------|-----------------------|-----------------|-----------------------------------------------|------|-------------|-------|
| 69 | B    | het | c.[671C>T] (;) [=]<br>p.[Ala224Val] (;) [=]   | M      | 5                          | 5                    | 0                      | 0                 | 1     | 3   | 4                  | 0.06                  | YES             | 2086                                          | 52.6 | 67          | T     |
| 70 | B    | het | c.[1399+4_1399+7del] (;) [=]                  | M      | 35                         | 35                   | 0                      | 3                 | 0     | 6   | 9                  | 2.25                  |                 | 568                                           | >90  | 39          |       |
| 71 | B    | het | c.[1399+4_1399+7del] (;) [=]                  | F      | 44                         | 45                   | 1                      | 2                 | 1     | 0   | 4                  | 0.75                  |                 | 1277                                          | 83.3 | 48          |       |
| 72 | B    | het | c.[exon 12 del] (;) [=]                       | M      | 24                         | 24                   | 0                      | too many to count | 0     | 3   | many               | NK                    | YES             | –<br>(n/a Tx)                                 | Tx   | 61          |       |
| 73 | ?    |     | Nil detected with exon sequencing or MLPA     | M      | 34                         | 34                   | 0                      | 1-2 per year      | 4     | 3   | >10                | ~2.08                 |                 | 1762                                          | 54.8 | 46          | pc, T |
| 74 | ?    |     | Nil detected with exon sequencing or MLPA     | M      | 16                         | 16                   | 0                      | 1 per year        | 7     | 2   | 8                  | ~2.29                 |                 | 2348                                          | >90  | 23          | pc, T |
| 75 | ?    |     | Nil detected with exon sequencing or MLPA     | M      | 29                         | 29                   | 0                      | 6 per year        | 0     | 1   | >157               | ~6.04                 |                 | 3964                                          | 87.2 | 55          | pc, c |
| 76 | ?    |     | Nil detected with exon sequencing or MLPA     | M      | 54                         | 54                   | 0                      | 2                 | 3     | 0   | 5                  | 0.83                  |                 | 578                                           | 82   | 60          | –     |

Key/explanation of abbreviations used in table:

Rows highlighted in matching colours delineate groups of patients with identical genetic mutations. **ID** - where members of the same family are included, each family is denoted with a family identifier (e.g. F1, F2 etc.), **Hom**=homozygous (both alleles same mutation), **Com het** = compound heterozygote (2 different mutations detected, one in each allele), **het**=heterozygote (single mutated allele detected). **Delay in diagnosis** represents the time from a patient's first stone episode until the diagnosis of cystinuria was made. **Spont stones**=number of cystine stones passed spontaneously by patients not including stones passed after lithotripsy. **Litho**= number of lithotripsy sessions. **Ops**=number of operations to remove cystine stones (including open, percutaneous and endourological procedures). **24 hour cystine** stated as value on first testing i.e. off medication, and value in brackets refers to most recent value. <sup>#</sup>Units: 1000 $\mu\text{mol/L}$  is equivalent to 240mg/L, therefore to convert values given to mg/L divide by 4.161. For patients marked \* the initial cystine measurement is spot cystine (units=  $\mu\text{mol}/\text{mmol}$  creatinine, normal range 3-17) patient 48 = 123, patient 59 = 163. **eGFR**=estimated glomerular filtration rate ( $\text{ml}/\text{min}/\text{m}^2$ ) using abbreviated MDRD formulae, **\*\***=patient has congenital single kidney, **\*\*\***=nephrectomy in 1953. **Tx**=renal transplant. **Rx** denotes medications currently prescribed – **lp**= low protein, **pc**=potassium citrate, **sb**=sodium bicarbonate, **P**=penicillamine, **T**=tiopronin. **NK** = not known, **n/a** = not applicable.
